# Supplementary material
Source: HighWire-hosted journal article supplement (http://www.ajevonline.org/highwire/filestream/1914/field_highwire_adjunct_files/0/13_081SuppData.pdf)
Supplement: 13_081SuppData.pdf [file 13_081SuppData.pdf]

**Supplemental Data for:**

Sen, I., and F. Tokatli. 2014.

Characterization and classification of Turkish wines based on elemental composition.

Am. J. Enol. Vitic. 65:134-142. doi: 10.5344/ajev.2013.13081.

**Supplemental Table 1** Loadings of elements for the established PLS-DA models for regional and varietal discriminations.

| Red-regional model |                   |                   | White-regional model |       |       | Red-varietal model |       |       | White-varietal model |        |        |
|--------------------|-------------------|-------------------|----------------------|-------|-------|--------------------|-------|-------|----------------------|--------|--------|
|                    | w[1] <sup>a</sup> | w[2] <sup>a</sup> |                      | w[1]  | w[2]  |                    | w[1]  | w[2]  |                      | w[1]   | w[2]   |
| Ca                 | 0.43              | -0.25             | Mg                   | 0.35  | 0.17  | Ca                 | 0.43  | -0.17 | K                    | -0.052 | 0.347  |
| Sr                 | 0.07              | 0.51              | Sr                   | -0.63 | -0.21 | K                  | -0.38 | 0.15  | Mg                   | 0.400  | -0.217 |
| B                  | 0.42              | -0.12             | Al                   | -0.23 | 0.39  | B                  | -0.47 | 0.22  | Na                   | 0.019  | -0.319 |
| Al                 | 0.13              | 0.62              | Ba                   | -0.11 | -0.12 | Al                 | -0.07 | 0.35  | Sr                   | 0.361  | 0.354  |
| Li                 | -0.15             | 0.08              | Li                   | 0.50  | 0.01  | Ba                 | -0.26 | 0.28  | Li                   | 0.398  | 0.502  |
| Ni                 | -0.48             | -0.38             | Co                   | 0.28  | -0.24 | Li                 | -0.17 | -0.32 | Mn                   | 0.460  | -0.239 |
| Cu                 | -0.29             | 0.35              | Ni                   | -0.29 | -0.46 | Mn                 | -0.06 | -0.52 | Co                   | 0.462  | -0.092 |
| Pb                 | -0.53             | -0.14             | Pb                   | -0.04 | -0.73 | Cu                 | -0.45 | -0.12 | Cu                   | 0.161  | 0.406  |
|                    |                   |                   |                      |       |       | Zn                 | -0.38 | -0.56 | Pb                   | 0.312  | -0.352 |

<sup>a</sup>w[1] and w[2] are the loading weights for components 1 and 2, respectively.

**Supplemental Table 2** Prediction sets and membership probabilities of PLS-DA models for regional and varietal discriminations.

| Prediction set/<br>variety-region | Membership probability |                       | Prediction set/<br>variety-region | Membership probability  |                         |
|-----------------------------------|------------------------|-----------------------|-----------------------------------|-------------------------|-------------------------|
|                                   | Red-varietal<br>model  | Red-regional<br>model |                                   | White-varietal<br>model | White-regional<br>model |
| Kalecik Karası-Denizli            | 0.90                   | 0.50                  | Emir-Cappadocia                   | 0.77                    | 0.61                    |
| Kalecik Karası-Denizli            | 0.29                   | 0.82                  | Emir-Cappadocia                   | 0.83                    | 0.39                    |
| Kalecik Karası-Izmir              | 0.33                   | 0.17                  | Chardonnay-Denizli                | 0.74                    | 0.42                    |
| Syrah-Denizli                     | 0.47                   | 0.40                  | Chardonnay-Izmir                  | 0.98                    | 0.24                    |
| Çalkarası-Denizli                 | 0.66                   | 0.31                  | Narince-Tokat                     | 0.91                    | 0.64                    |
| Öküzgözü-Izmir                    | 0.43                   | 0.13                  | Muscat-Izmir                      | 0.14                    | 0.30                    |
| Öküzgözü-Elazığ                   | 0.62                   | 0.84                  | Muscat-Thrace                     | 0.78                    | 0.47                    |
| Öküzgözü-Elazığ                   | 0.76                   | 0.74                  | Muscat-Denizli                    | 0.66                    | 0.49                    |
| Merlot-Izmir                      | 0.57                   | 0.87                  |                                   |                         |                         |
| Merlot-Denizli                    | 0.55                   | 0.98                  |                                   |                         |                         |
| Cabernet Sauvignon-Tokat          | 0.45                   | 0.85                  |                                   |                         |                         |
| Cabernet Sauvignon-Thrace         | 0.16                   | 0.99                  |                                   |                         |                         |
